# Supplementary material for: Infant airway microbiota and topical immune perturbations in the origins of childhood asthma
Source: PubMed Central journal article supplement (PMC6825176; doi:10.1038/s41467-019-12989-7), 2019-11-01

## **Supplementary information for the article**

### **Thorsen et al. – “Infant airway microbiota and topical immune perturbations in the origins of childhood asthma”**

#### **Contents**

Supplementary Table 1: Differential abundances and asthma

Supplementary Table 2: Diversity and differential abundances at 1 week and 3 months

Supplementary Table 3: Contributions of bacterial taxa to the bacterial asthma score

Supplementary Table 4: Associations between inherited and environmental factors and the bacterial asthma score

Supplementary Table 5: Associations between the bacterial asthma score and immune mediators

Supplementary Table 6: Mediation analysis between the bacterial asthma score and immune mediators in their mutual associations with asthma

Supplementary Figure 1: Mean relative genus abundances by sample time point

Supplementary Figure 2: Community structure in the 1-month airway microbiota and asthma

Supplementary Figure 3: Correlations between taxa at one month

Supplementary Figure 4: Cross-validation of sparse Partial Least Squares model

Supplementary Figure 5: Bacterial asthma score composition

Supplementary Figure 6: Immune mediator correlations

Supplementary Figure 7: Adjustment of bacterial asthma score

Supplementary Figure 8: Immune mediator score loadings

## Supplementary Table 1: Differential abundances and asthma

Associations between log-relative abundances at one month and asthma development, assessed with Cox proportional hazards regression, as displayed in figure 1. Mean relative abundance and presence (fraction of samples positive for taxon) are given for all taxa, for all samples and stratified by asthma by age six years.

| Taxon               | Phylum         | HR   | 95% CI |       | P-value  | q-value | Mean relative abundance |          |           | Presence |        |           |
|---------------------|----------------|------|--------|-------|----------|---------|-------------------------|----------|-----------|----------|--------|-----------|
|                     |                |      | lower  | upper |          |         | All                     | Asthma   | No asthma | All      | Asthma | No asthma |
| Veillonella         | Firmicutes     | 1.45 | 1.21   | 1.73  | 0.000041 | 0.0026  | 3.1E-02                 | 4.79E-02 | 2.83E-02  | 0.98     | 0.99   | 0.98      |
| Prevotella          | Bacteroidetes  | 1.32 | 1.13   | 1.55  | 0.00055  | 0.017   | 3.7E-03                 | 6.62E-03 | 2.65E-03  | 0.67     | 0.71   | 0.66      |
| Gemella             | Firmicutes     | 1.28 | 1.07   | 1.52  | 0.0059   | 0.11    | 4.1E-02                 | 5.16E-02 | 3.95E-02  | 1.00     | 1.00   | 1.00      |
| Bacilli             | Firmicutes     | 1.25 | 1.06   | 1.48  | 0.0073   | 0.11    | 5.1E-04                 | 7.16E-04 | 4.66E-04  | 0.73     | 0.80   | 0.72      |
| Bacillales          | Firmicutes     | 1.26 | 1.06   | 1.49  | 0.0085   | 0.11    | 1.6E-03                 | 1.77E-03 | 1.61E-03  | 0.86     | 0.88   | 0.86      |
| Lactobacillus       | Firmicutes     | 1.21 | 1.03   | 1.42  | 0.018    | 0.19    | 1.0E-02                 | 1.48E-02 | 9.23E-03  | 0.72     | 0.73   | 0.72      |
| Streptococcus       | Firmicutes     | 1.22 | 1.01   | 1.47  | 0.034    | 0.31    | 3.1E-01                 | 3.32E-01 | 3.01E-01  | 1.00     | 1.00   | 1.00      |
| Neisseria           | Proteobacteria | 1.18 | 1.00   | 1.38  | 0.045    | 0.35    | 2.3E-02                 | 2.73E-02 | 2.15E-02  | 0.89     | 0.90   | 0.89      |
| Scardovia           | Actinobacteria | 1.10 | 0.96   | 1.27  | 0.18     | 0.85    | 1.7E-04                 | 2.39E-04 | 1.72E-04  | 0.10     | 0.13   | 0.10      |
| Campylobacter       | Proteobacteria | 1.10 | 0.95   | 1.28  | 0.19     | 0.85    | 4.6E-04                 | 3.40E-04 | 5.05E-04  | 0.24     | 0.29   | 0.22      |
| Enhydrobacter       | Proteobacteria | 0.87 | 0.71   | 1.07  | 0.20     | 0.85    | 1.4E-04                 | 1.03E-04 | 1.69E-04  | 0.13     | 0.10   | 0.14      |
| Lachnospiraceae     | Firmicutes     | 1.11 | 0.95   | 1.29  | 0.21     | 0.85    | 9.4E-04                 | 1.35E-03 | 7.46E-04  | 0.39     | 0.46   | 0.37      |
| Enterococcus        | Firmicutes     | 1.10 | 0.94   | 1.29  | 0.22     | 0.85    | 2.1E-03                 | 6.07E-03 | 9.59E-04  | 0.32     | 0.33   | 0.30      |
| Enterobacteriaceae  | Proteobacteria | 1.10 | 0.94   | 1.30  | 0.24     | 0.85    | 3.2E-02                 | 4.60E-02 | 2.38E-02  | 0.88     | 0.86   | 0.89      |
| Staphylococcus      | Firmicutes     | 1.10 | 0.94   | 1.30  | 0.24     | 0.85    | 2.2E-01                 | 2.07E-01 | 2.15E-01  | 1.00     | 1.00   | 1.00      |
| Bacteroides         | Bacteroidetes  | 1.09 | 0.94   | 1.25  | 0.27     | 0.85    | 5.1E-04                 | 8.95E-05 | 6.97E-04  | 0.22     | 0.27   | 0.22      |
| Micrococcaceae      | Actinobacteria | 0.91 | 0.77   | 1.08  | 0.28     | 0.85    | 2.8E-03                 | 1.73E-03 | 2.88E-03  | 0.59     | 0.53   | 0.60      |
| Aquabacterium       | Proteobacteria | 0.91 | 0.76   | 1.09  | 0.30     | 0.85    | 3.2E-04                 | 1.11E-04 | 4.11E-04  | 0.23     | 0.20   | 0.25      |
| Actinomyces         | Actinobacteria | 1.08 | 0.93   | 1.27  | 0.32     | 0.85    | 1.2E-03                 | 1.55E-03 | 1.23E-03  | 0.45     | 0.46   | 0.45      |
| Dolosigranulum      | Firmicutes     | 0.92 | 0.78   | 1.09  | 0.32     | 0.85    | 1.4E-02                 | 1.36E-02 | 1.47E-02  | 0.89     | 0.87   | 0.90      |
| Moraxella           | Proteobacteria | 0.92 | 0.78   | 1.09  | 0.33     | 0.85    | 1.3E-01                 | 9.40E-02 | 1.49E-01  | 1.00     | 1.00   | 1.00      |
| Fusobacterium       | Fusobacteria   | 1.08 | 0.92   | 1.27  | 0.33     | 0.85    | 2.3E-03                 | 2.60E-03 | 2.40E-03  | 0.46     | 0.48   | 0.45      |
| Micrococcus         | Actinobacteria | 0.92 | 0.77   | 1.10  | 0.34     | 0.85    | 1.2E-03                 | 1.17E-04 | 1.65E-03  | 0.39     | 0.37   | 0.41      |
| Gp6                 | Other          | 0.91 | 0.75   | 1.11  | 0.34     | 0.85    | 3.4E-04                 | 4.85E-05 | 4.71E-04  | 0.15     | 0.15   | 0.16      |
| Porphyromonadaceae  | Bacteroidetes  | 1.08 | 0.92   | 1.27  | 0.35     | 0.85    | 1.4E-03                 | 1.74E-03 | 1.37E-03  | 0.47     | 0.50   | 0.47      |
| Tumebacillus        | Firmicutes     | 1.08 | 0.92   | 1.26  | 0.35     | 0.85    | 2.9E-04                 | 5.74E-04 | 1.86E-04  | 0.22     | 0.24   | 0.22      |
| Betaproteobacteria  | Proteobacteria | 0.91 | 0.75   | 1.11  | 0.37     | 0.85    | 1.2E-04                 | 2.70E-05 | 1.63E-04  | 0.11     | 0.10   | 0.13      |
| Neisseriaceae       | Proteobacteria | 1.07 | 0.92   | 1.25  | 0.39     | 0.88    | 1.9E-04                 | 9.77E-05 | 2.14E-04  | 0.19     | 0.19   | 0.19      |
| Flavobacteriaceae   | Bacteroidetes  | 1.07 | 0.91   | 1.26  | 0.41     | 0.88    | 1.1E-03                 | 1.14E-03 | 1.15E-03  | 0.62     | 0.64   | 0.62      |
| Pseudomonas         | Proteobacteria | 1.06 | 0.91   | 1.24  | 0.45     | 0.88    | 3.2E-03                 | 2.71E-03 | 3.64E-03  | 0.45     | 0.48   | 0.45      |
| Staphylococcaceae   | Firmicutes     | 1.06 | 0.90   | 1.25  | 0.46     | 0.88    | 2.5E-04                 | 2.59E-04 | 2.47E-04  | 0.61     | 0.63   | 0.60      |
| Gammaproteobacteria | Proteobacteria | 0.94 | 0.79   | 1.12  | 0.48     | 0.88    | 1.7E-04                 | 1.41E-04 | 1.98E-04  | 0.27     | 0.25   | 0.27      |
| Haemophilus         | Proteobacteria | 1.05 | 0.90   | 1.24  | 0.53     | 0.88    | 5.3E-02                 | 3.28E-02 | 5.76E-02  | 0.98     | 0.98   | 0.98      |
| Atopobium           | Actinobacteria | 1.05 | 0.90   | 1.23  | 0.53     | 0.88    | 4.6E-04                 | 4.83E-04 | 4.69E-04  | 0.26     | 0.25   | 0.26      |
| Bacteroidetes       | Bacteroidetes  | 1.05 | 0.89   | 1.24  | 0.54     | 0.88    | 1.3E-03                 | 1.19E-03 | 1.21E-03  | 0.43     | 0.45   | 0.43      |
| Rothia              | Actinobacteria | 1.05 | 0.89   | 1.24  | 0.55     | 0.88    | 3.8E-03                 | 4.57E-03 | 3.88E-03  | 0.66     | 0.69   | 0.66      |

|                           |                |      |      |      |      |      |         |          |          |      |      |      |
|---------------------------|----------------|------|------|------|------|------|---------|----------|----------|------|------|------|
| Chitinophagaceae          | Bacteroidetes  | 0.95 | 0.80 | 1.13 | 0.55 | 0.88 | 1.2E-03 | 1.85E-04 | 1.66E-03 | 0.29 | 0.27 | 0.30 |
| Acidovorax                | Proteobacteria | 0.95 | 0.79 | 1.14 | 0.56 | 0.88 | 1.9E-04 | 4.78E-05 | 2.56E-04 | 0.11 | 0.10 | 0.12 |
| Porphyromonas             | Bacteroidetes  | 0.95 | 0.79 | 1.13 | 0.56 | 0.88 | 1.0E-04 | 3.62E-05 | 1.00E-04 | 0.15 | 0.16 | 0.14 |
| Gp16                      | Other          | 0.95 | 0.80 | 1.14 | 0.58 | 0.88 | 2.0E-04 | 2.23E-05 | 2.74E-04 | 0.14 | 0.14 | 0.15 |
| Clostridium sensu stricto | Firmicutes     | 0.95 | 0.81 | 1.13 | 0.59 | 0.88 | 5.0E-04 | 6.54E-05 | 6.90E-04 | 0.28 | 0.31 | 0.28 |
| Bifidobacterium           | Actinobacteria | 1.04 | 0.89 | 1.22 | 0.59 | 0.88 | 8.7E-04 | 9.87E-04 | 9.21E-04 | 0.33 | 0.33 | 0.33 |
| Granulicatella            | Firmicutes     | 1.04 | 0.89 | 1.23 | 0.61 | 0.88 | 2.5E-03 | 2.48E-03 | 2.62E-03 | 0.57 | 0.57 | 0.57 |
| Rhizobiales               | Proteobacteria | 0.96 | 0.80 | 1.14 | 0.62 | 0.88 | 1.8E-04 | 1.38E-04 | 2.06E-04 | 0.18 | 0.16 | 0.19 |
| Leptotrichiaceae          | Fusobacteria   | 1.03 | 0.88 | 1.22 | 0.69 | 0.94 | 2.2E-03 | 3.21E-03 | 1.89E-03 | 0.32 | 0.33 | 0.32 |
| Myxococcales              | Proteobacteria | 0.97 | 0.82 | 1.14 | 0.69 | 0.94 | 1.5E-04 | 6.54E-06 | 2.04E-04 | 0.14 | 0.15 | 0.14 |
| Listeria                  | Firmicutes     | 0.97 | 0.82 | 1.15 | 0.75 | 0.94 | 2.1E-04 | 4.07E-05 | 2.87E-04 | 0.19 | 0.21 | 0.20 |
| Sphingomonas              | Proteobacteria | 1.02 | 0.87 | 1.20 | 0.77 | 0.94 | 9.0E-04 | 4.95E-04 | 1.07E-03 | 0.29 | 0.32 | 0.28 |
| Actinomycetales           | Actinobacteria | 1.02 | 0.87 | 1.20 | 0.77 | 0.94 | 3.0E-04 | 1.59E-04 | 3.50E-04 | 0.49 | 0.50 | 0.50 |
| Helicobacter              | Proteobacteria | 0.98 | 0.82 | 1.16 | 0.78 | 0.94 | 2.0E-04 | 1.03E-04 | 2.54E-04 | 0.22 | 0.23 | 0.22 |
| Acinetobacter             | Proteobacteria | 0.98 | 0.83 | 1.15 | 0.78 | 0.94 | 5.8E-03 | 4.69E-04 | 5.97E-03 | 0.50 | 0.50 | 0.50 |
| Arthrobacter              | Actinobacteria | 0.98 | 0.82 | 1.16 | 0.79 | 0.94 | 1.1E-03 | 8.77E-05 | 1.58E-03 | 0.19 | 0.17 | 0.19 |
| Streptophyta              | Other          | 1.02 | 0.87 | 1.20 | 0.79 | 0.94 | 1.9E-03 | 2.66E-03 | 1.79E-03 | 0.27 | 0.28 | 0.27 |
| Rhodobacter               | Proteobacteria | 0.98 | 0.83 | 1.16 | 0.84 | 0.98 | 2.8E-04 | 9.64E-05 | 3.66E-04 | 0.16 | 0.16 | 0.17 |
| Bacteria                  | Other          | 1.01 | 0.86 | 1.19 | 0.87 | 0.98 | 1.3E-03 | 3.85E-04 | 1.68E-03 | 0.50 | 0.53 | 0.50 |
| Corynebacterium           | Actinobacteria | 1.01 | 0.86 | 1.19 | 0.88 | 0.98 | 5.9E-02 | 6.31E-02 | 5.60E-02 | 0.99 | 1.00 | 0.99 |
| Alphaproteobacteria       | Proteobacteria | 0.99 | 0.84 | 1.17 | 0.92 | 0.98 | 5.2E-04 | 2.55E-04 | 6.58E-04 | 0.29 | 0.29 | 0.30 |
| Pelomonas                 | Proteobacteria | 0.99 | 0.84 | 1.17 | 0.93 | 0.98 | 5.4E-03 | 2.31E-03 | 6.56E-03 | 0.74 | 0.79 | 0.74 |
| Gp3                       | Other          | 1.01 | 0.86 | 1.18 | 0.94 | 0.98 | 4.0E-04 | 1.00E-04 | 5.29E-04 | 0.21 | 0.23 | 0.21 |
| Deinococcus               | Other          | 1.01 | 0.86 | 1.18 | 0.94 | 0.98 | 3.8E-04 | 5.23E-04 | 3.79E-04 | 0.17 | 0.20 | 0.17 |
| Pasteurellaceae           | Proteobacteria | 0.99 | 0.84 | 1.17 | 0.95 | 0.98 | 1.1E-02 | 1.13E-02 | 1.09E-02 | 0.87 | 0.87 | 0.87 |
| Cloacibacterium           | Bacteroidetes  | 1.00 | 0.85 | 1.17 | 0.96 | 0.98 | 7.7E-04 | 1.66E-05 | 1.09E-03 | 0.12 | 0.16 | 0.11 |
| Ureaplasma                | Other          | 1.00 | 0.85 | 1.18 | 1.00 | 1.00 | 1.2E-03 | 6.03E-05 | 1.63E-03 | 0.16 | 0.17 | 0.16 |

## Supplementary Table 2: Diversity and differential abundances at 1 week and 3 months

Associations between microbiota diversity, individual microbial taxa and asthma by age 6 years. No results presented here were statistically significant. A) Associations between alpha diversity (measured as bootstrap richness estimates at 10,000 and 2,000 reads, and Shannon Diversity index) at 1 week and 3 months and asthma by age 6 years. P-values correspond to Wilcoxon Rank Sum tests. B) Associations between beta diversity (measured as Bray-Curtis or weighted UniFrac distances) at 1 week and 3 months and asthma by age 6 years, tested with Adonis PERMANOVA tests. C) Differential abundance tests between genus log relative abundances at 1 week and 3 months and asthma by age 6 years, tested with Cox proportional hazards regression.

| <b>A</b> |              |           |         |     |
|----------|--------------|-----------|---------|-----|
| Time     | Variable     | statistic | P-value | n   |
| 1w       | richness_10k | 17563.5   | 0.55    | 497 |
| 1w       | richness_2k  | 22030     | 0.60    | 497 |
| 1w       | Shannon      | 22725     | 0.99    | 497 |
| 3m       | richness_10k | 21223.5   | 0.42    | 574 |
| 3m       | richness_2k  | 28338     | 0.87    | 574 |
| 3m       | Shannon      | 26508     | 0.34    | 574 |

| <b>B</b> |                  |             |         |        |     |
|----------|------------------|-------------|---------|--------|-----|
| Time     | Metric           | F-statistic | P-value | R2     | n   |
| 1w       | Bray-Curtis      | 1.30        | 0.18    | 0.0026 | 497 |
| 1w       | weighted UniFrac | 0.68        | 0.59    | 0.0014 | 497 |
| 3m       | Bray-Curtis      | 1.40        | 0.12    | 0.0024 | 574 |
| 3m       | weighted UniFrac | 0.57        | 0.73    | 0.0010 | 574 |

| <b>C</b>  |                |                      |      |              |              |         |         |     |                         |          |
|-----------|----------------|----------------------|------|--------------|--------------|---------|---------|-----|-------------------------|----------|
| Timepoint | Phylum         | Genus                | HR   | 95% CI lower | 95% CI upper | P-value | q-value | n   | Mean relative abundance | Presence |
| 1 week    | Bacteroidetes  | Prevotella           | 0.74 | 0.59         | 0.93         | 0.01    | 0.41    | 544 | 1.9E-04                 | 0.26     |
| 1 week    | Fusobacteria   | Fusobacterium        | 0.69 | 0.51         | 0.93         | 0.01    | 0.41    | 544 | 2.4E-04                 | 0.13     |
| 1 week    | Firmicutes     | Veillonella          | 1.21 | 1.01         | 1.44         | 0.04    | 0.56    | 544 | 1.9E-02                 | 0.92     |
| 1 week    | Proteobacteria | Pasteurellaceae      | 1.19 | 1.01         | 1.41         | 0.04    | 0.56    | 544 | 6.1E-03                 | 0.73     |
| 1 week    | Proteobacteria | Haemophilus          | 1.19 | 1.00         | 1.41         | 0.05    | 0.56    | 544 | 1.9E-02                 | 0.86     |
| 1 week    | Proteobacteria | Sphingomonadaceae    | 0.82 | 0.66         | 1.02         | 0.07    | 0.63    | 544 | 2.5E-04                 | 0.17     |
| 1 week    | Other          | Streptophyta         | 0.83 | 0.68         | 1.03         | 0.09    | 0.63    | 544 | 2.1E-03                 | 0.22     |
| 1 week    | Proteobacteria | Escherichia_Shigella | 0.81 | 0.63         | 1.04         | 0.10    | 0.63    | 544 | 1.2E-04                 | 0.10     |
| 1 week    | Bacteroidetes  | Cloacibacterium      | 1.12 | 0.97         | 1.29         | 0.11    | 0.63    | 544 | 8.6E-04                 | 0.10     |
| 1 week    | Proteobacteria | Neisseria            | 1.14 | 0.97         | 1.35         | 0.12    | 0.63    | 544 | 1.1E-02                 | 0.79     |
| 1 week    | Actinobacteria | Micrococcus          | 0.87 | 0.72         | 1.05         | 0.14    | 0.63    | 544 | 1.3E-03                 | 0.33     |
| 1 week    | Firmicutes     | Bacillales           | 1.14 | 0.95         | 1.37         | 0.15    | 0.63    | 544 | 2.7E-03                 | 0.89     |
| 1 week    | Actinobacteria | Actinomyces          | 0.87 | 0.72         | 1.05         | 0.15    | 0.63    | 544 | 1.6E-03                 | 0.34     |
| 1 week    | Firmicutes     | Veillonellaceae      | 1.11 | 0.96         | 1.29         | 0.16    | 0.63    | 544 | 7.5E-04                 | 0.18     |

|        |                |                     |      |      |      |      |      |     |         |      |
|--------|----------------|---------------------|------|------|------|------|------|-----|---------|------|
| 1 week | Proteobacteria | Sphingomonas        | 0.88 | 0.72 | 1.06 | 0.18 | 0.63 | 544 | 5.0E-03 | 0.36 |
| 1 week | Firmicutes     | Listeria            | 1.10 | 0.95 | 1.29 | 0.21 | 0.63 | 544 | 1.7E-03 | 0.27 |
| 1 week | Bacteroidetes  | Bacteroidetes       | 0.89 | 0.73 | 1.07 | 0.21 | 0.63 | 544 | 2.9E-04 | 0.25 |
| 1 week | Proteobacteria | Pelomonas           | 0.90 | 0.75 | 1.07 | 0.22 | 0.63 | 544 | 1.1E-02 | 0.79 |
| 1 week | Firmicutes     | Lactobacillus       | 1.11 | 0.94 | 1.31 | 0.24 | 0.63 | 544 | 8.6E-03 | 0.62 |
| 1 week | Firmicutes     | Gemella             | 1.11 | 0.93 | 1.33 | 0.24 | 0.63 | 544 | 3.4E-02 | 0.99 |
| 1 week | Proteobacteria | Helicobacter        | 1.10 | 0.94 | 1.29 | 0.24 | 0.63 | 544 | 5.3E-03 | 0.36 |
| 1 week | Firmicutes     | Bacilli             | 1.11 | 0.93 | 1.32 | 0.25 | 0.63 | 544 | 6.8E-04 | 0.74 |
| 1 week | Proteobacteria | Aquabacterium       | 0.89 | 0.72 | 1.09 | 0.26 | 0.63 | 544 | 4.6E-04 | 0.12 |
| 1 week | Proteobacteria | Methylobacterium    | 0.89 | 0.73 | 1.09 | 0.26 | 0.63 | 544 | 4.1E-04 | 0.16 |
| 1 week | Proteobacteria | Polyangiaceae       | 0.89 | 0.72 | 1.10 | 0.27 | 0.63 | 544 | 3.2E-04 | 0.11 |
| 1 week | Firmicutes     | Lachnospiraceae     | 0.90 | 0.73 | 1.10 | 0.29 | 0.63 | 544 | 5.8E-04 | 0.17 |
| 1 week | Proteobacteria | Paracoccus          | 0.90 | 0.74 | 1.10 | 0.31 | 0.63 | 544 | 8.1E-04 | 0.17 |
| 1 week | Firmicutes     | Streptococcus       | 1.10 | 0.92 | 1.31 | 0.31 | 0.63 | 544 | 1.7E-01 | 1.00 |
| 1 week | Proteobacteria | Acinetobacter       | 0.91 | 0.76 | 1.09 | 0.31 | 0.63 | 544 | 5.5E-03 | 0.49 |
| 1 week | Proteobacteria | Rhodobacter         | 1.08 | 0.92 | 1.26 | 0.34 | 0.64 | 544 | 2.1E-03 | 0.19 |
| 1 week | Other          | Deinococcus         | 1.08 | 0.92 | 1.26 | 0.34 | 0.64 | 544 | 3.5E-03 | 0.24 |
| 1 week | Proteobacteria | Comamonas           | 1.08 | 0.92 | 1.25 | 0.35 | 0.64 | 544 | 7.1E-04 | 0.15 |
| 1 week | Proteobacteria | Moraxella           | 0.93 | 0.78 | 1.11 | 0.40 | 0.68 | 544 | 8.9E-02 | 0.99 |
| 1 week | Bacteroidetes  | Porphyromonadaceae  | 0.92 | 0.76 | 1.11 | 0.40 | 0.68 | 544 | 7.3E-04 | 0.28 |
| 1 week | Actinobacteria | Micrococcaceae      | 1.07 | 0.91 | 1.27 | 0.43 | 0.70 | 544 | 2.9E-03 | 0.55 |
| 1 week | Firmicutes     | Enterococcus        | 1.07 | 0.91 | 1.25 | 0.43 | 0.70 | 544 | 2.1E-03 | 0.28 |
| 1 week | Proteobacteria | Alphaproteobacteria | 0.93 | 0.78 | 1.12 | 0.45 | 0.70 | 544 | 1.3E-03 | 0.25 |
| 1 week | Proteobacteria | Neisseriaceae       | 1.06 | 0.90 | 1.24 | 0.48 | 0.74 | 544 | 1.8E-04 | 0.13 |
| 1 week | Actinobacteria | Corynebacterium     | 0.94 | 0.79 | 1.12 | 0.50 | 0.74 | 544 | 2.6E-02 | 0.94 |
| 1 week | Bacteroidetes  | Flavobacteriaceae   | 0.95 | 0.79 | 1.13 | 0.54 | 0.79 | 544 | 1.0E-03 | 0.43 |
| 1 week | Firmicutes     | Dolosigranulum      | 0.95 | 0.80 | 1.13 | 0.56 | 0.79 | 544 | 1.0E-02 | 0.76 |
| 1 week | Fusobacteria   | Leptotrichiaceae    | 0.95 | 0.78 | 1.15 | 0.58 | 0.80 | 544 | 2.7E-04 | 0.11 |
| 1 week | Proteobacteria | Proteobacteria      | 1.04 | 0.89 | 1.21 | 0.66 | 0.86 | 544 | 2.9E-04 | 0.11 |
| 1 week | Firmicutes     | Tumebacillus        | 1.03 | 0.88 | 1.21 | 0.69 | 0.86 | 544 | 3.1E-04 | 0.13 |
| 1 week | Firmicutes     | Granulicatella      | 0.96 | 0.80 | 1.15 | 0.69 | 0.86 | 544 | 1.0E-03 | 0.35 |
| 1 week | Other          | Bacteria            | 0.96 | 0.80 | 1.16 | 0.69 | 0.86 | 544 | 3.5E-03 | 0.32 |
| 1 week | Actinobacteria | Bifidobacterium     | 1.03 | 0.88 | 1.22 | 0.69 | 0.86 | 544 | 1.8E-04 | 0.15 |
| 1 week | Firmicutes     | Staphylococcaceae   | 0.97 | 0.82 | 1.15 | 0.72 | 0.87 | 544 | 9.0E-04 | 0.82 |
| 1 week | Actinobacteria | Rothia              | 1.03 | 0.87 | 1.22 | 0.74 | 0.88 | 544 | 1.3E-03 | 0.49 |
| 1 week | Actinobacteria | Actinomycetales     | 0.97 | 0.82 | 1.16 | 0.77 | 0.89 | 544 | 2.7E-04 | 0.30 |
| 1 week | Firmicutes     | Salinicoccus        | 1.02 | 0.86 | 1.22 | 0.83 | 0.92 | 544 | 1.6E-04 | 0.72 |
| 1 week | Bacteroidetes  | Bacteroides         | 1.02 | 0.86 | 1.21 | 0.83 | 0.92 | 544 | 1.1E-03 | 0.21 |
| 1 week | Bacteroidetes  | Chitinophagaceae    | 1.02 | 0.86 | 1.21 | 0.84 | 0.92 | 544 | 2.8E-03 | 0.24 |
| 1 week | Proteobacteria | Gammaproteobacteria | 1.01 | 0.85 | 1.20 | 0.92 | 0.99 | 544 | 7.7E-04 | 0.22 |

|          |                |                           |      |      |      |      |      |     |         |      |
|----------|----------------|---------------------------|------|------|------|------|------|-----|---------|------|
| 1 week   | Proteobacteria | Pseudomonas               | 1.01 | 0.85 | 1.19 | 0.95 | 0.99 | 544 | 6.9E-03 | 0.49 |
| 1 week   | Firmicutes     | Clostridium_sensu_stricto | 1.00 | 0.85 | 1.19 | 0.97 | 0.99 | 544 | 4.2E-03 | 0.28 |
| 1 week   | Firmicutes     | Staphylococcus            | 1.00 | 0.84 | 1.19 | 0.97 | 0.99 | 544 | 4.9E-01 | 1.00 |
| 1 week   | Proteobacteria | Enterobacteriaceae        | 1.00 | 0.84 | 1.19 | 0.99 | 0.99 | 544 | 2.6E-02 | 0.81 |
| 3 months | Proteobacteria | Paracoccus                | 0.70 | 0.54 | 0.92 | 0.01 | 0.38 | 622 | 3.9E-04 | 0.19 |
| 3 months | Proteobacteria | Escherichia_Shigella      | 1.18 | 1.02 | 1.35 | 0.02 | 0.38 | 622 | 8.4E-04 | 0.15 |
| 3 months | Proteobacteria | Comamonas                 | 0.78 | 0.63 | 0.97 | 0.02 | 0.38 | 622 | 1.8E-03 | 0.31 |
| 3 months | Proteobacteria | Enterobacteriaceae        | 1.21 | 1.02 | 1.43 | 0.03 | 0.38 | 622 | 3.1E-02 | 0.89 |
| 3 months | Proteobacteria | Moraxella                 | 0.83 | 0.70 | 0.98 | 0.03 | 0.38 | 622 | 2.4E-01 | 1.00 |
| 3 months | Proteobacteria | Pseudomonas               | 0.81 | 0.67 | 0.99 | 0.04 | 0.46 | 622 | 3.2E-03 | 0.40 |
| 3 months | Proteobacteria | Neisseria                 | 1.19 | 1.00 | 1.41 | 0.05 | 0.49 | 622 | 3.7E-02 | 0.95 |
| 3 months | Fusobacteria   | Leptotrichia              | 1.14 | 0.99 | 1.32 | 0.07 | 0.49 | 622 | 1.9E-04 | 0.14 |
| 3 months | Proteobacteria | Helicobacter              | 0.81 | 0.65 | 1.02 | 0.07 | 0.49 | 622 | 5.0E-04 | 0.19 |
| 3 months | Firmicutes     | Dolosigranulum            | 0.86 | 0.72 | 1.02 | 0.08 | 0.49 | 622 | 1.4E-02 | 0.87 |
| 3 months | Bacteroidetes  | Chitinophagaceae          | 0.83 | 0.67 | 1.02 | 0.08 | 0.49 | 622 | 1.4E-03 | 0.27 |
| 3 months | Bacteroidetes  | Capnocytophaga            | 1.13 | 0.98 | 1.29 | 0.09 | 0.49 | 622 | 4.6E-04 | 0.11 |
| 3 months | Proteobacteria | Methylobacterium          | 0.82 | 0.66 | 1.03 | 0.09 | 0.49 | 622 | 4.4E-04 | 0.17 |
| 3 months | Firmicutes     | Staphylococcus            | 0.86 | 0.72 | 1.03 | 0.10 | 0.50 | 622 | 9.9E-02 | 0.98 |
| 3 months | Bacteroidetes  | Bacteroides               | 0.87 | 0.72 | 1.04 | 0.13 | 0.62 | 622 | 8.2E-04 | 0.43 |
| 3 months | Actinobacteria | Mycobacterium             | 0.86 | 0.70 | 1.06 | 0.17 | 0.68 | 622 | 3.7E-04 | 0.17 |
| 3 months | Proteobacteria | Neisseriaceae             | 1.12 | 0.95 | 1.32 | 0.17 | 0.68 | 622 | 1.4E-03 | 0.40 |
| 3 months | Proteobacteria | Aquabacterium             | 0.88 | 0.72 | 1.07 | 0.20 | 0.68 | 622 | 3.3E-04 | 0.23 |
| 3 months | Proteobacteria | Sphingomonadaceae         | 0.89 | 0.75 | 1.06 | 0.21 | 0.68 | 622 | 3.5E-03 | 0.72 |
| 3 months | Firmicutes     | Megasphaera               | 0.87 | 0.71 | 1.08 | 0.21 | 0.68 | 622 | 2.3E-04 | 0.13 |
| 3 months | Firmicutes     | Anaerococcus              | 0.87 | 0.69 | 1.09 | 0.22 | 0.68 | 622 | 2.1E-04 | 0.11 |
| 3 months | Firmicutes     | Streptococcus             | 0.90 | 0.76 | 1.07 | 0.23 | 0.68 | 622 | 2.9E-01 | 1.00 |
| 3 months | Bacteroidetes  | Prevotella                | 1.10 | 0.92 | 1.31 | 0.29 | 0.68 | 622 | 1.3E-02 | 0.88 |
| 3 months | Other          | Streptophyta              | 0.90 | 0.74 | 1.09 | 0.29 | 0.68 | 622 | 6.0E-04 | 0.20 |
| 3 months | Proteobacteria | Alphaproteobacteria       | 0.90 | 0.74 | 1.09 | 0.29 | 0.68 | 622 | 1.0E-03 | 0.29 |
| 3 months | Bacteroidetes  | Prevotellaceae            | 1.09 | 0.93 | 1.29 | 0.30 | 0.68 | 622 | 9.7E-04 | 0.38 |
| 3 months | Actinobacteria | Atopobium                 | 1.09 | 0.93 | 1.28 | 0.30 | 0.68 | 622 | 5.0E-04 | 0.33 |
| 3 months | Proteobacteria | Gammaproteobacteria       | 0.91 | 0.76 | 1.09 | 0.31 | 0.68 | 622 | 3.9E-04 | 0.31 |
| 3 months | Firmicutes     | Lachnospiraceae           | 0.91 | 0.76 | 1.09 | 0.31 | 0.68 | 622 | 2.7E-03 | 0.56 |
| 3 months | Actinobacteria | Bifidobacterium           | 0.91 | 0.76 | 1.09 | 0.32 | 0.68 | 622 | 6.5E-04 | 0.38 |
| 3 months | Actinobacteria | Rothia                    | 1.09 | 0.92 | 1.29 | 0.32 | 0.68 | 622 | 1.1E-02 | 0.81 |
| 3 months | Firmicutes     | Gemella                   | 0.92 | 0.77 | 1.09 | 0.33 | 0.68 | 622 | 2.2E-02 | 0.96 |
| 3 months | Other          | Bacteria                  | 0.91 | 0.76 | 1.10 | 0.34 | 0.68 | 622 | 1.2E-03 | 0.31 |
| 3 months | Proteobacteria | Acinetobacter             | 0.92 | 0.77 | 1.10 | 0.36 | 0.68 | 622 | 6.2E-03 | 0.53 |
| 3 months | Other          | Deinococcus               | 0.91 | 0.75 | 1.11 | 0.37 | 0.68 | 622 | 1.4E-04 | 0.13 |
| 3 months | Bacteroidetes  | Flavobacteriaceae         | 0.93 | 0.78 | 1.10 | 0.38 | 0.68 | 622 | 1.1E-03 | 0.59 |

|          |                |                           |      |      |      |      |      |     |         |      |
|----------|----------------|---------------------------|------|------|------|------|------|-----|---------|------|
| 3 months | Actinobacteria | Corynebacterium           | 0.93 | 0.78 | 1.10 | 0.38 | 0.68 | 622 | 3.5E-02 | 0.95 |
| 3 months | Firmicutes     | Bacillales                | 0.93 | 0.78 | 1.10 | 0.40 | 0.68 | 622 | 1.4E-03 | 0.67 |
| 3 months | Bacteroidetes  | Cloacibacterium           | 0.92 | 0.76 | 1.12 | 0.42 | 0.68 | 622 | 3.4E-04 | 0.15 |
| 3 months | Bacteroidetes  | Porphyromonadaceae        | 0.93 | 0.78 | 1.11 | 0.43 | 0.68 | 622 | 2.9E-03 | 0.64 |
| 3 months | Actinobacteria | Micrococcus               | 0.93 | 0.77 | 1.12 | 0.43 | 0.68 | 622 | 5.5E-04 | 0.33 |
| 3 months | Proteobacteria | Sphingomonas              | 0.93 | 0.77 | 1.12 | 0.43 | 0.68 | 622 | 2.1E-03 | 0.35 |
| 3 months | Firmicutes     | Clostridium sensu stricto | 0.93 | 0.77 | 1.12 | 0.44 | 0.68 | 622 | 1.2E-03 | 0.30 |
| 3 months | Firmicutes     | Bacilli                   | 0.94 | 0.79 | 1.11 | 0.45 | 0.68 | 622 | 2.6E-04 | 0.51 |
| 3 months | Firmicutes     | Ruminococcaceae           | 0.93 | 0.76 | 1.13 | 0.46 | 0.68 | 622 | 1.4E-04 | 0.14 |
| 3 months | Other          | Ureaplasma                | 0.93 | 0.77 | 1.13 | 0.46 | 0.68 | 622 | 4.2E-04 | 0.13 |
| 3 months | Proteobacteria | Pasteurellaceae           | 0.94 | 0.79 | 1.11 | 0.46 | 0.68 | 622 | 1.2E-02 | 0.89 |
| 3 months | Firmicutes     | Enterococcus              | 0.94 | 0.78 | 1.13 | 0.49 | 0.68 | 622 | 5.4E-04 | 0.31 |
| 3 months | Proteobacteria | Polyangiaceae             | 1.06 | 0.91 | 1.23 | 0.49 | 0.68 | 622 | 4.7E-04 | 0.10 |
| 3 months | Firmicutes     | Clostridiales             | 1.06 | 0.90 | 1.25 | 0.49 | 0.68 | 622 | 2.0E-04 | 0.27 |
| 3 months | Proteobacteria | Haemophilus               | 1.05 | 0.89 | 1.25 | 0.56 | 0.76 | 622 | 7.0E-02 | 0.98 |
| 3 months | Actinobacteria | Micrococcaceae            | 1.05 | 0.89 | 1.24 | 0.57 | 0.77 | 622 | 3.1E-03 | 0.56 |
| 3 months | Firmicutes     | Granulicatella            | 0.96 | 0.80 | 1.14 | 0.62 | 0.80 | 622 | 4.0E-03 | 0.65 |
| 3 months | Fusobacteria   | Leptotrichiaceae          | 1.04 | 0.88 | 1.23 | 0.63 | 0.80 | 622 | 4.2E-03 | 0.50 |
| 3 months | Proteobacteria | Rhodobacter               | 0.96 | 0.80 | 1.15 | 0.63 | 0.80 | 622 | 3.5E-04 | 0.13 |
| 3 months | Proteobacteria | Novosphingobium           | 0.96 | 0.80 | 1.15 | 0.64 | 0.80 | 622 | 5.1E-04 | 0.16 |
| 3 months | Firmicutes     | Lactobacillus             | 1.03 | 0.87 | 1.23 | 0.71 | 0.85 | 622 | 5.3E-03 | 0.61 |
| 3 months | Actinobacteria | Actinomycetales           | 0.97 | 0.81 | 1.15 | 0.72 | 0.85 | 622 | 4.7E-04 | 0.48 |
| 3 months | Bacteroidetes  | Porphyromonas             | 0.97 | 0.81 | 1.15 | 0.73 | 0.85 | 622 | 7.3E-04 | 0.39 |
| 3 months | Fusobacteria   | Fusobacterium             | 0.97 | 0.81 | 1.15 | 0.73 | 0.85 | 622 | 1.0E-02 | 0.81 |
| 3 months | Firmicutes     | Faecalibacterium          | 1.03 | 0.87 | 1.21 | 0.76 | 0.86 | 622 | 2.3E-04 | 0.14 |
| 3 months | Proteobacteria | Campylobacter             | 1.03 | 0.87 | 1.22 | 0.77 | 0.86 | 622 | 8.2E-04 | 0.35 |
| 3 months | Actinobacteria | Actinomyces               | 0.98 | 0.82 | 1.16 | 0.80 | 0.89 | 622 | 2.4E-03 | 0.63 |
| 3 months | Bacteroidetes  | Bacteroidetes             | 0.99 | 0.83 | 1.18 | 0.89 | 0.97 | 622 | 8.2E-03 | 0.76 |
| 3 months | Firmicutes     | Tumebacillus              | 0.99 | 0.83 | 1.17 | 0.90 | 0.97 | 622 | 2.1E-04 | 0.15 |
| 3 months | Proteobacteria | Pelomonas                 | 0.99 | 0.84 | 1.18 | 0.93 | 0.99 | 622 | 4.9E-03 | 0.77 |
| 3 months | Firmicutes     | Listeria                  | 1.00 | 0.84 | 1.18 | 0.96 | 1.00 | 622 | 8.8E-04 | 0.16 |
| 3 months | Firmicutes     | Veillonella               | 1.00 | 0.84 | 1.19 | 0.98 | 1.00 | 622 | 3.2E-02 | 0.97 |
| 3 months | Proteobacteria | Acidovorax                | 1.00 | 0.84 | 1.19 | 0.99 | 1.00 | 622 | 1.0E-04 | 0.12 |
| 3 months | Proteobacteria | Enhydrobacter             | 1.00 | 0.84 | 1.19 | 1.00 | 1.00 | 622 | 1.8E-04 | 0.14 |

### Supplementary Table 3: Contributions of bacterial taxa to the bacterial asthma score

Relative importance is calculated from the median loadings across cross-validation folds in the sparse Partial Least Squares (sPLS) model.

| <b>Taxon</b>  | <b>Folds selected</b> | <b>Median loading</b> | <b>Relative importance</b> | <b>Mean relative abundance</b> | <b>Presence (fraction positive)</b> |
|---------------|-----------------------|-----------------------|----------------------------|--------------------------------|-------------------------------------|
| Veillonella   | 10                    | 0.63                  | 28.1%                      | 0.031                          | 0.98                                |
| Prevotella    | 10                    | 0.53                  | 23.7%                      | 0.0037                         | 0.67                                |
| Gemella       | 10                    | 0.36                  | 16.3%                      | 0.041                          | 1                                   |
| Bacillales    | 9                     | 0.27                  | 12.3%                      | 0.0016                         | 0.86                                |
| Bacilli       | 10                    | 0.27                  | 12.2%                      | 0.00051                        | 0.73                                |
| Streptococcus | 9                     | 0.12                  | 5.4%                       | 0.31                           | 1                                   |
| Lactobacillus | 5                     | 0.046                 | 2.1%                       | 0.01                           | 0.72                                |



**Supplementary Table 4: Associations between inherited and environmental factors and the bacterial asthma score**

|                                   | <b>Estimate</b> | <b>Lower<br/>95% CI</b> | <b>Upper<br/>95% CI</b> | <b>Std.<br/>error</b> | <b>P-value</b> | <b>q-value</b> |
|-----------------------------------|-----------------|-------------------------|-------------------------|-----------------------|----------------|----------------|
| Sex (Male)                        | -0.05           | -0.22                   | 0.11                    | 0.08                  | 0.54           | 0.93           |
| Maternal asthma                   | -0.04           | -0.22                   | 0.15                    | 0.10                  | 0.71           | 0.94           |
| Paternal asthma                   | 0.21            | 0.00                    | 0.41                    | 0.10                  | 0.047          | 0.30           |
| Maternal allergy                  | -0.13           | -0.30                   | 0.05                    | 0.09                  | 0.16           | 0.77           |
| Paternal allergy                  | 0.04            | -0.14                   | 0.23                    | 0.09                  | 0.64           | 0.94           |
|                                   |                 |                         |                         |                       |                |                |
| Fish-oil intervention             | -0.03           | -0.19                   | 0.14                    | 0.08                  | 0.76           | 0.94           |
| Vitamin D intervention            | -0.05           | -0.23                   | 0.12                    | 0.09                  | 0.54           | 0.93           |
|                                   |                 |                         |                         |                       |                |                |
| Antibiotics in pregnancy          | 0.01            | -0.16                   | 0.19                    | 0.09                  | 0.88           | 0.94           |
| Antibiotics at birth (child)      | -0.03           | -0.53                   | 0.47                    | 0.25                  | 0.90           | 0.94           |
| Antibiotics at birth (mother)     | -0.10           | -0.28                   | 0.07                    | 0.09                  | 0.25           | 0.93           |
| Antibiotic treatment, first month | -0.23           | -0.68                   | 0.21                    | 0.23                  | 0.30           | 0.93           |
| Virus PCR positive, 1 month       | 0.08            | -0.16                   | 0.32                    | 0.12                  | 0.53           | 0.93           |
| Dog in the home                   | -0.01           | -0.22                   | 0.21                    | 0.11                  | 0.94           | 0.94           |
| Cat in the home                   | -0.10           | -0.30                   | 0.11                    | 0.11                  | 0.36           | 0.93           |
| Caesarean section                 | -0.05           | -0.25                   | 0.15                    | 0.10                  | 0.64           | 0.94           |
| Smoking during pregnancy          | -0.10           | -0.44                   | 0.23                    | 0.17                  | 0.54           | 0.94           |
| Season of birth                   |                 |                         |                         |                       | 0.0021         | 0.04           |
| Winter                            | 0.23            | 0.01                    | 0.46                    | 0.11                  | 0.041          |                |
| Summer                            | -0.20           | -0.45                   | 0.05                    | 0.13                  | 0.11           |                |
| Spring                            | 0.03            | -0.21                   | 0.27                    | 0.12                  | 0.81           |                |
| Breastfeeding at one month        | -0.03           | -0.23                   | 0.18                    | 0.10                  | 0.80           | 0.94           |
| Older siblings                    | -0.17           | -0.34                   | -0.01                   | 0.08                  | 0.042          | 0.30           |

**Supplementary Table 5: Associations between the bacterial asthma score and immune mediators**

| <b>Model</b> | <b>Mediator</b> | <b>Type</b> | <b>Estimate</b> | <b>Lower 95% CI</b> | <b>Upper 95% CI</b> | <b>P-value</b> | <b>q-value</b> |
|--------------|-----------------|-------------|-----------------|---------------------|---------------------|----------------|----------------|
| Crude        | TNF-a           | Type 1      | 0.85            | 0.78                | 0.93                | 0.00033        | 0.0066         |
| Crude        | IL-10           | Regulatory  | 0.87            | 0.79                | 0.94                | 0.00089        | 0.0077         |
| Crude        | IL-1b           | Type 17     | 0.86            | 0.79                | 0.94                | 0.0012         | 0.0077         |
| Crude        | CCL17           | Type 2      | 1.15            | 1.06                | 1.25                | 0.0015         | 0.0077         |
| Crude        | IL-13           | Type 2      | 0.88            | 0.80                | 0.96                | 0.0040         | 0.016          |
| Crude        | CCL2            | Type 1      | 1.14            | 1.04                | 1.24                | 0.0054         | 0.018          |
| Crude        | CCL11           | Type 2      | 1.10            | 1.01                | 1.20                | 0.028          | 0.079          |
| Crude        | IL-2            | Regulatory  | 0.91            | 0.84                | 0.99                | 0.037          | 0.092          |
| Crude        | IL-17A          | Type 17     | 0.92            | 0.84                | 1.01                | 0.075          | 0.17           |
| Crude        | CCL13           | Type 2      | 1.08            | 0.99                | 1.18                | 0.094          | 0.19           |
| Crude        | IL-5            | Type 2      | 1.06            | 0.97                | 1.15                | 0.20           | 0.34           |
| Crude        | CXCL8           | Type 17     | 0.95            | 0.87                | 1.03                | 0.20           | 0.34           |
| Crude        | CCL4            | Type 1      | 0.95            | 0.87                | 1.03                | 0.23           | 0.35           |
| Crude        | TGF-b1          | Regulatory  | 1.04            | 0.95                | 1.13                | 0.42           | 0.59           |
| Crude        | CCL26           | Type 2      | 0.97            | 0.89                | 1.06                | 0.46           | 0.59           |
| Crude        | IFN-g           | Type 1      | 1.03            | 0.95                | 1.12                | 0.48           | 0.59           |
| Crude        | CCL22           | Type 2      | 0.98            | 0.90                | 1.08                | 0.70           | 0.81           |
| Crude        | IL-12p70        | Type 1      | 1.02            | 0.93                | 1.11                | 0.73           | 0.81           |
| Crude        | CXCL10          | Type 1      | 1.00            | 0.91                | 1.09                | 0.96           | 0.97           |
| Crude        | IL-4            | Type 2      | 1.00            | 0.92                | 1.09                | 0.97           | 0.97           |
| Adjusted     | CCL17           | Type 2      | 1.22            | 1.09                | 1.37                | 0.00049        | 0.0076         |
| Adjusted     | IL-1b           | Type 17     | 0.82            | 0.73                | 0.92                | 0.0011         | 0.0076         |
| Adjusted     | CCL2            | Type 1      | 1.22            | 1.08                | 1.37                | 0.0012         | 0.0076         |
| Adjusted     | TNF-a           | Type 1      | 0.83            | 0.74                | 0.93                | 0.0015         | 0.0076         |
| Adjusted     | CCL11           | Type 2      | 1.14            | 1.02                | 1.28                | 0.024          | 0.097          |
| Adjusted     | CCL13           | Type 2      | 1.13            | 1.01                | 1.27                | 0.032          | 0.11           |
| Adjusted     | IL-10           | Regulatory  | 0.90            | 0.81                | 1.01                | 0.072          | 0.21           |
| Adjusted     | IL-13           | Type 2      | 0.90            | 0.80                | 1.02                | 0.093          | 0.21           |
| Adjusted     | CCL22           | Type 2      | 0.90            | 0.80                | 1.02                | 0.096          | 0.21           |
| Adjusted     | IL-12p70        | Type 1      | 1.09            | 0.97                | 1.23                | 0.15           | 0.30           |
| Adjusted     | TGF-b1          | Regulatory  | 1.08            | 0.96                | 1.22                | 0.19           | 0.33           |
| Adjusted     | CCL4            | Type 1      | 0.93            | 0.83                | 1.04                | 0.20           | 0.33           |
| Adjusted     | CXCL10          | Type 1      | 0.94            | 0.84                | 1.06                | 0.32           | 0.50           |
| Adjusted     | IL-17A          | Type 17     | 0.95            | 0.85                | 1.07                | 0.43           | 0.61           |
| Adjusted     | IFN-g           | Type 1      | 1.04            | 0.93                | 1.17                | 0.49           | 0.64           |
| Adjusted     | CCL26           | Type 2      | 0.96            | 0.86                | 1.08                | 0.51           | 0.64           |
| Adjusted     | IL-5            | Type 2      | 0.97            | 0.87                | 1.09                | 0.62           | 0.72           |
| Adjusted     | IL-4            | Type 2      | 1.02            | 0.91                | 1.15                | 0.69           | 0.76           |
| Adjusted     | IL-2            | Regulatory  | 0.99            | 0.88                | 1.11                | 0.88           | 0.92           |
| Adjusted     | CXCL8           | Type 17     | 1.00            | 0.90                | 1.12                | 0.96           | 0.96           |

## Supplementary Table 6: Mediation analysis between the bacterial asthma score and immune mediators in their mutual associations with asthma

Results from mediation analyses of the shared part of the associations between the bacterial asthma score and the immune mediator score as predictors for asthma. A) Effect estimates are presented for single-predictor model analyses (Individual) and mutually adjusted analyses (Combined). In the overall analyses (Asthma ever by age 6 years), we find only slight attenuation of the estimates for both the bacterial asthma score and the immune mediator score when comparing the individual vs. the combined analyses, thus indicating a low degree of mediation and a large unique contribution to the risk of asthma for both predictors. The same pattern is observed in all the parallel analyses using time-dependent phenotypes (for definitions, please refer to table 2). HR – Hazard ratio (Cox proportional hazards regression), CI – Confidence Interval, OR – Odds Ratio (Logistic regression). Only children with full data available for both the 1 month airway microbiota, the immune mediator score and clinical follow-up were included in these analyses. B) Results from causal mediation analysis, quantifying Average Causal Mediated Effect (ACME) and Average Direct Effect (ADE), and the proportion of mediation (~10%) of the immune mediator score in the effect of the bacterial asthma score on asthma, indicating a significant partial mediation. Results from quasi-Bayesian vs bootstrap estimation were nearly identical. Note that while the name of the analysis contains “causal”, these data are observational.

### A

| Asthma phenotype   | Analysis   | Bacterial asthma score |             |         | Immune mediator score |             |         | N<br>Cases/Controls |
|--------------------|------------|------------------------|-------------|---------|-----------------------|-------------|---------|---------------------|
|                    |            | HR                     | 95% CI      | p-value | HR                    | 95% CI      | p-value |                     |
| Overall            | Individual | 1.42                   | [1.17-1.71] | 0.00032 | 1.34                  | [1.11-1.61] | 0.0019  | 117/382             |
| Overall            | Combined   | 1.37                   | [1.13-1.67] | 0.0012  | 1.29                  | [1.07-1.55] | 0.0077  | 117/382             |
|                    |            | OR                     | 95% CI      | p-value | OR                    | 95% CI      | p-value |                     |
| Transient early    | Individual | 1.32                   | [1.02-1.72] | 0.035   | 1.38                  | [1.07-1.80] | 0.013   | 72/382              |
| Transient early    | Combined   | 1.27                   | [0.98-1.66] | 0.076   | 1.34                  | [1.04-1.75] | 0.027   | 72/382              |
| Persistent         | Individual | 1.69                   | [1.08-2.72] | 0.026   | 1.38                  | [0.90-2.13] | 0.14    | 23/382              |
| Persistent         | Combined   | 1.64                   | [1.04-2.65] | 0.039   | 1.31                  | [0.84-2.03] | 0.23    | 23/382              |
| Late-onset         | Individual | 2.20                   | [1.36-3.71] | 0.0019  | 1.49                  | [0.96-2.33] | 0.075   | 22/382              |
| Late-onset         | Combined   | 2.13                   | [1.31-3.62] | 0.0032  | 1.39                  | [0.88-2.20] | 0.16    | 22/382              |
| Current at 6 years | Individual | 1.86                   | [1.29-2.76] | 0.0014  | 1.48                  | [1.05-2.11] | 0.028   | 37/382              |
| Current at 6 years | Combined   | 1.81                   | [1.24-2.70] | 0.0028  | 1.40                  | [0.98-2.01] | 0.064   | 37/382              |

### B

| Computation method | Effect                                                             | Estimate | 95% CI          | p-value |
|--------------------|--------------------------------------------------------------------|----------|-----------------|---------|
| quasiBayesian      | ACME                                                               | 0.0088   | [0.0019-0.0181] | 0.0076  |
| quasiBayesian      | ADE                                                                | 0.0726   | [0.0286-0.1186] | 0.0016  |
| quasiBayesian      | Proportion (ACME/Total)                                            | 0.1051   | [0.0222-0.2824] | 0.0078  |
| quasiBayesian      | Total                                                              | 0.0813   | [0.0365-0.1287] | 0.0002  |
| bootstrap          | ACME                                                               | 0.0088   | [0.0020-0.0179] | 0.006   |
| bootstrap          | ADE                                                                | 0.0723   | [0.0286-0.1223] | 0.0012  |
| bootstrap          | Proportion (ACME/Total)                                            | 0.1087   | [0.0232-0.2816] | 0.0062  |
| bootstrap          | Total                                                              | 0.0811   | [0.0374-0.1322] | 0.0002  |
| <b>Outcome</b>     | Asthma by age 6 years (Yes/No)                                     |          |                 |         |
| <b>Predictor</b>   | Bacterial asthma score                                             |          |                 |         |
| <b>Mediator</b>    | Immune mediator score                                              |          |                 |         |
| <b>Model 1</b>     | Linear regression (Immune mediator score ~ Bacterial asthma score) |          |                 |         |

**Model 2**

Logistic regression (Asthma6yr(y/n) ~ Immune mediator score + Bacterial asthma score)

## Supplementary Figure 1: Mean relative genus abundances by sample time point

Only genera with >1% mean relative abundance at one of the three sample time points are included. Colored by taxonomic phylum, sorted by mean relative abundance at 1 week.

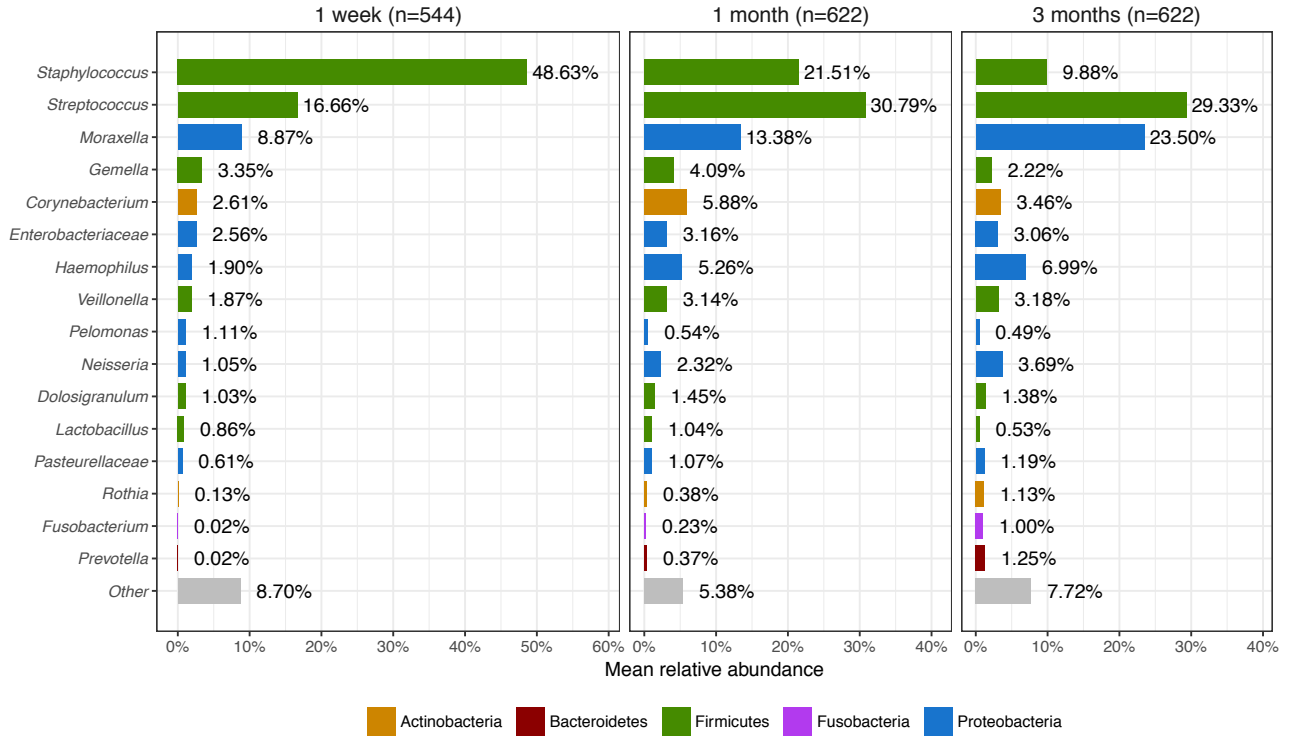

## Supplementary Figure 2: Community structure in the 1-month airway microbiota and asthma

Principal Coordinates Analysis (PCoA) plots of Bray-Curtis (A) and weighted UniFrac (B) distances in the 1-month airway microbiota, colored by asthma status by age 6 years. P-values correspond to adonis PERMANOVA tests.

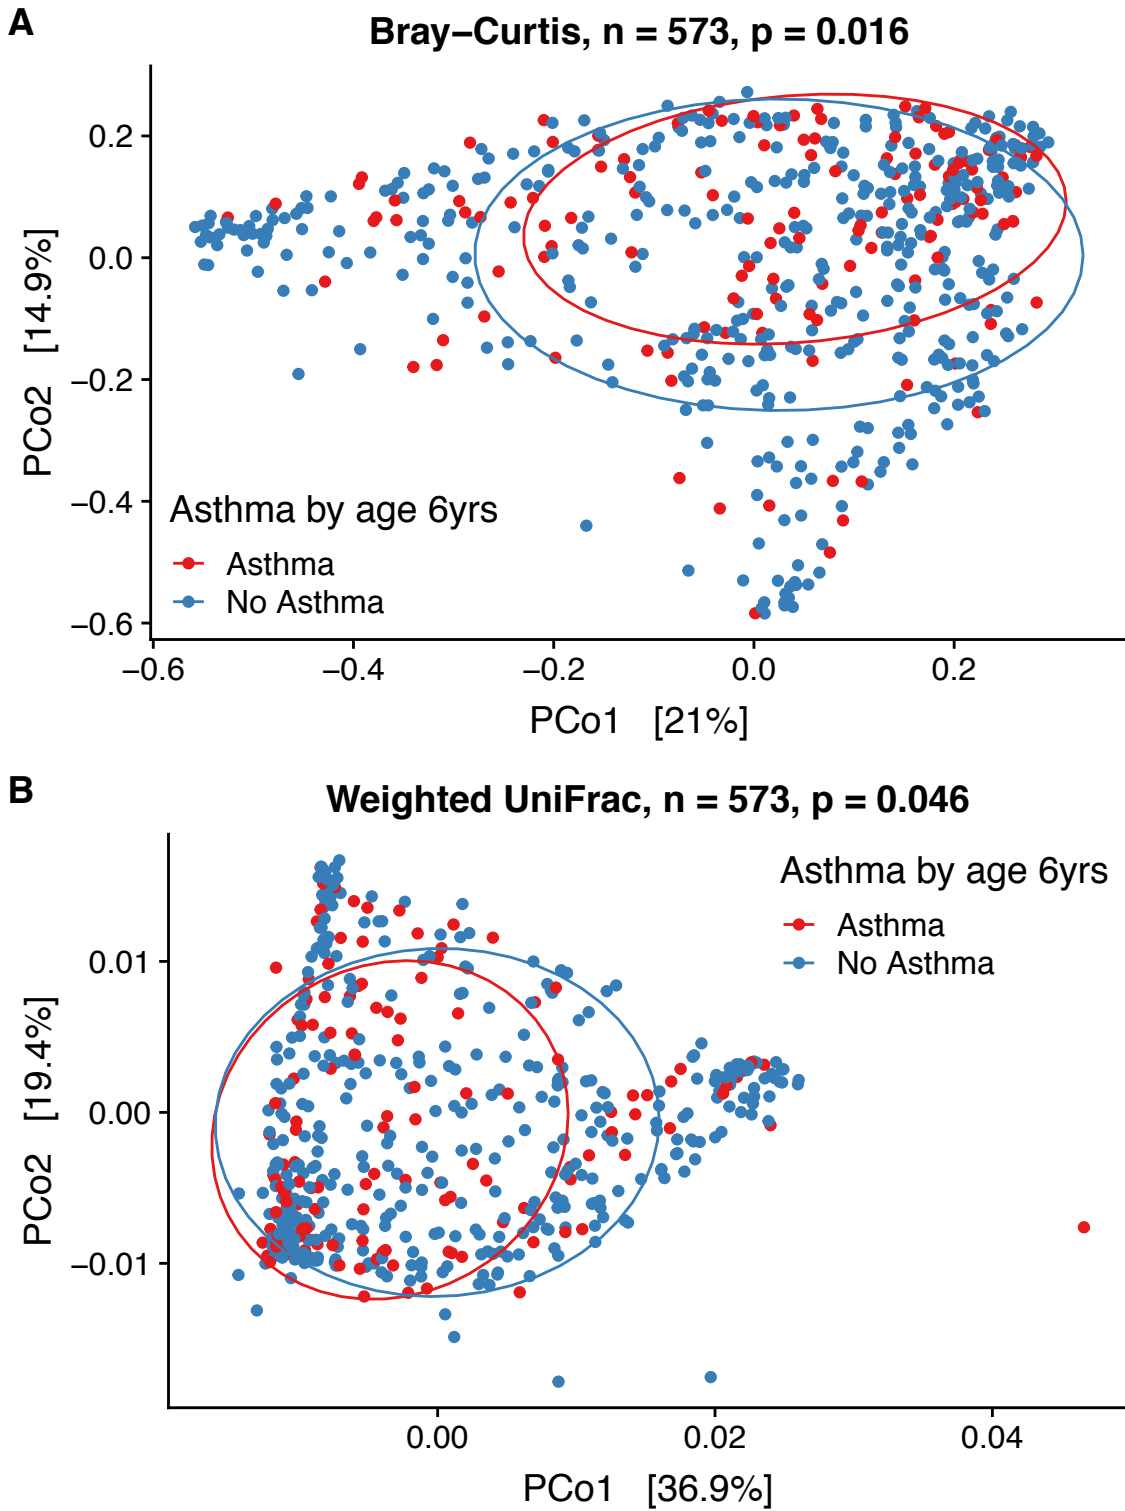

### Supplementary Figure 3: Correlations between taxa at one month

Spearman correlation heatmap between genera at one month (n=573), filtered by >10% presence and >10<sup>-4</sup> mean relative abundance. Values are shown in each cell.

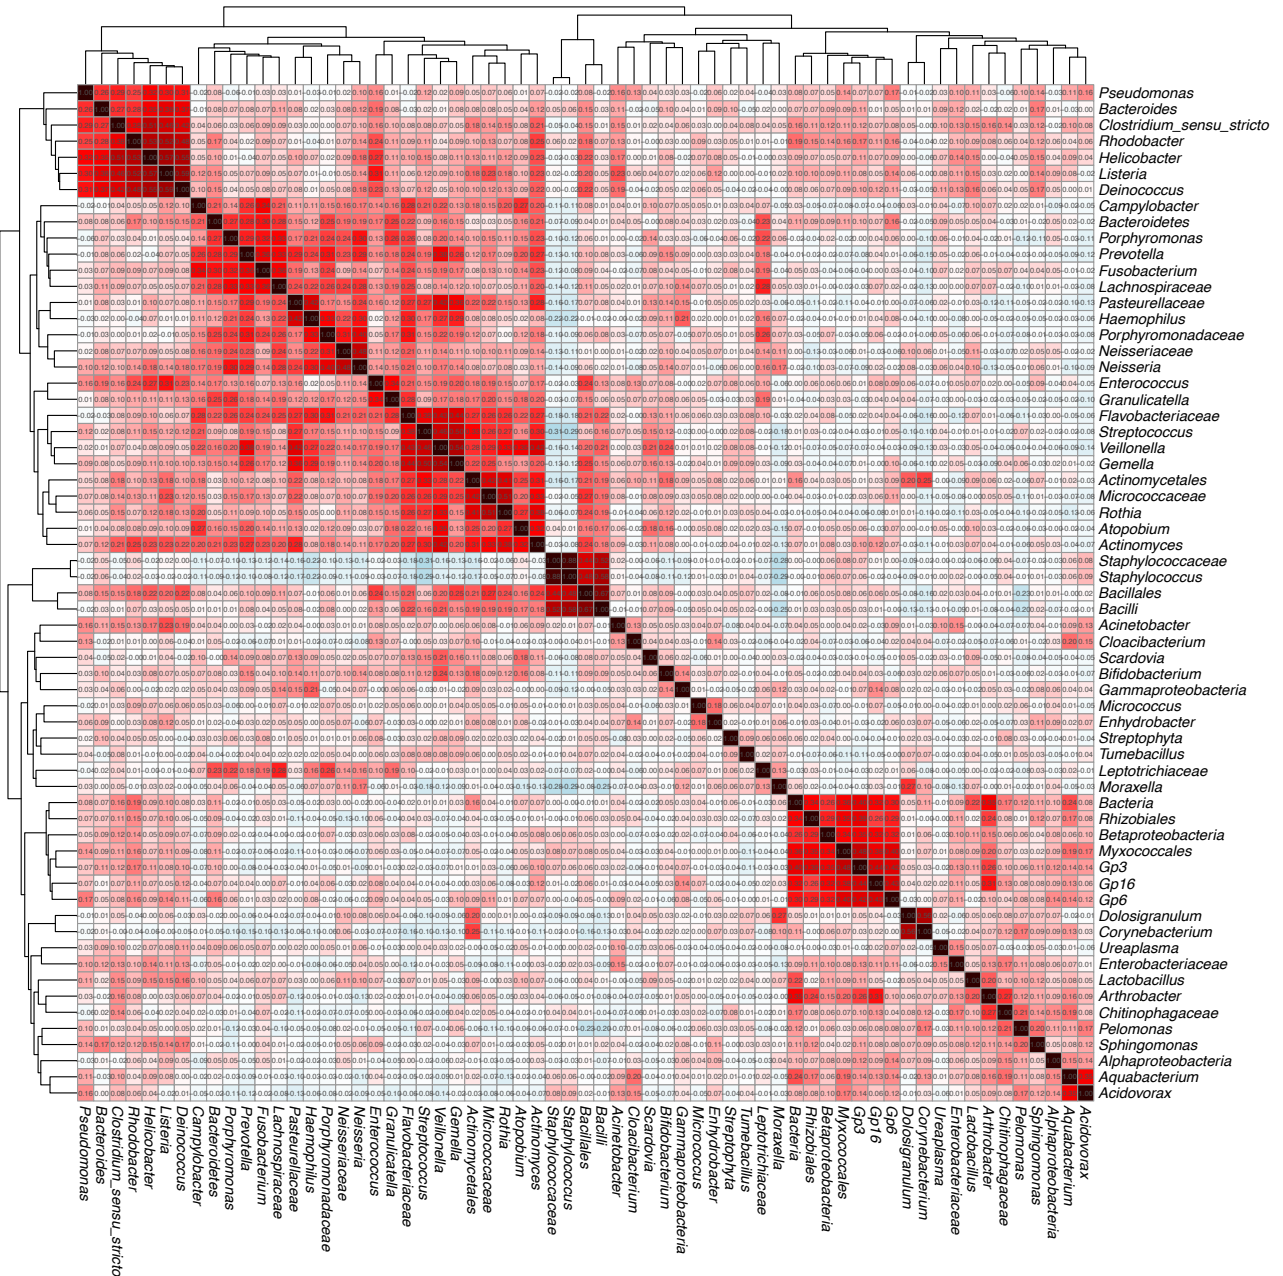

## Supplementary Figure 4: Cross-validation of sparse Partial Least Squares model

Cross-validation plot showing AUC results from repeated 10-fold cross-validation of Partial Least Squares models between bacterial genera and asthma, according to number of variables and number of components. Boxplot features: Box denotes 25<sup>th</sup> and 75<sup>th</sup> percentile, middle line denotes median, whiskers extend to any data points inside 1.5 x interquartile range from the box. N=573.

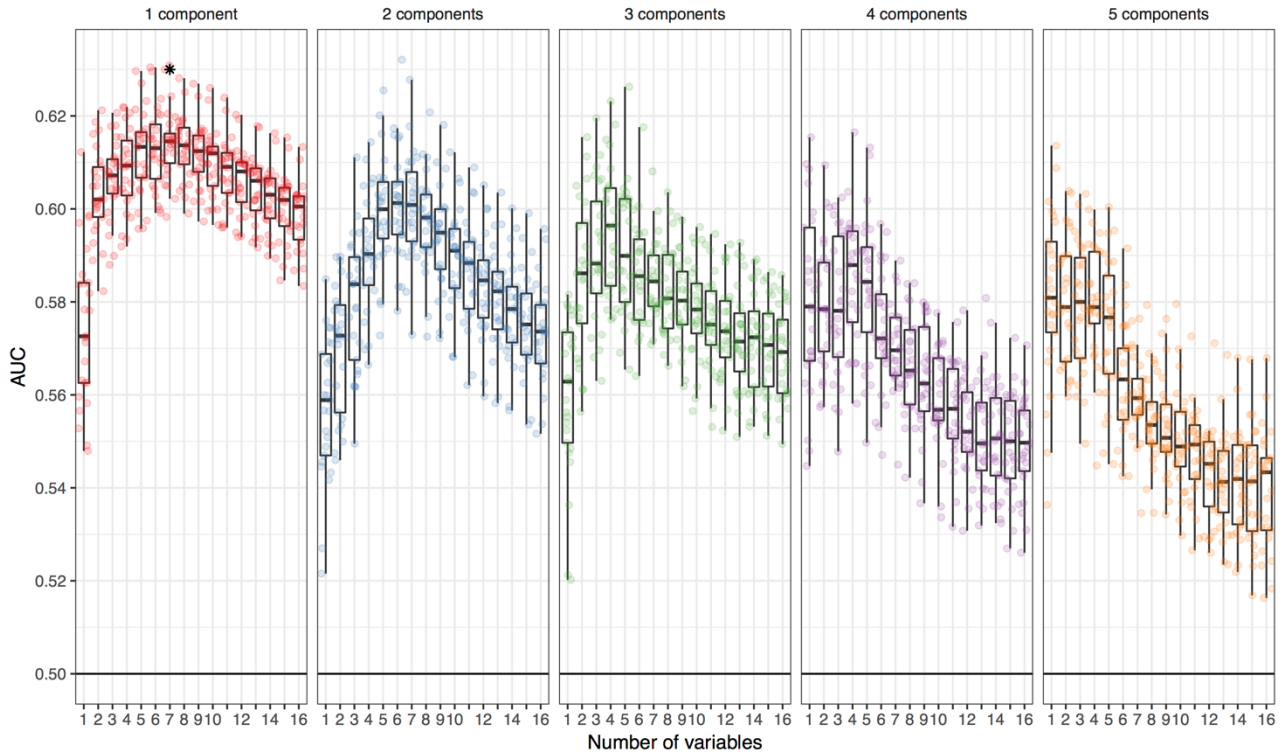



## Supplementary Figure 5: Bacterial asthma score composition

Bacterial asthma score and the relative abundances of the seven bacterial genera on which it is based, colored by the tertiles which are used in figure 2. The model is built using repeated cross-validation to avoid overfitting. The relative importance of each taxon is denoted in parentheses. N=573.

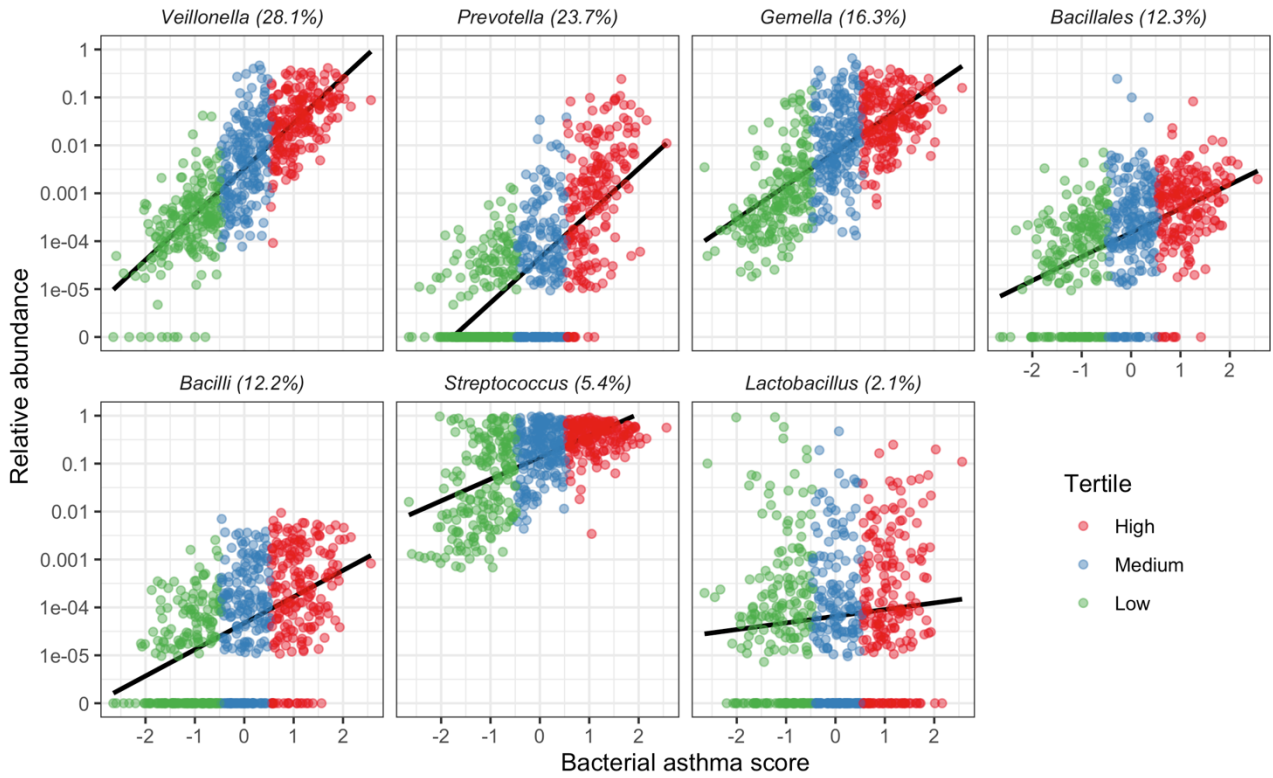

## Supplementary Figure 6: Immune mediator correlations

Pearson correlation heatmap between total-sum normalized, log-transformed immune mediator concentrations from nasal mucosal lining fluid at one month of age. Values are shown in each cell. N=499.

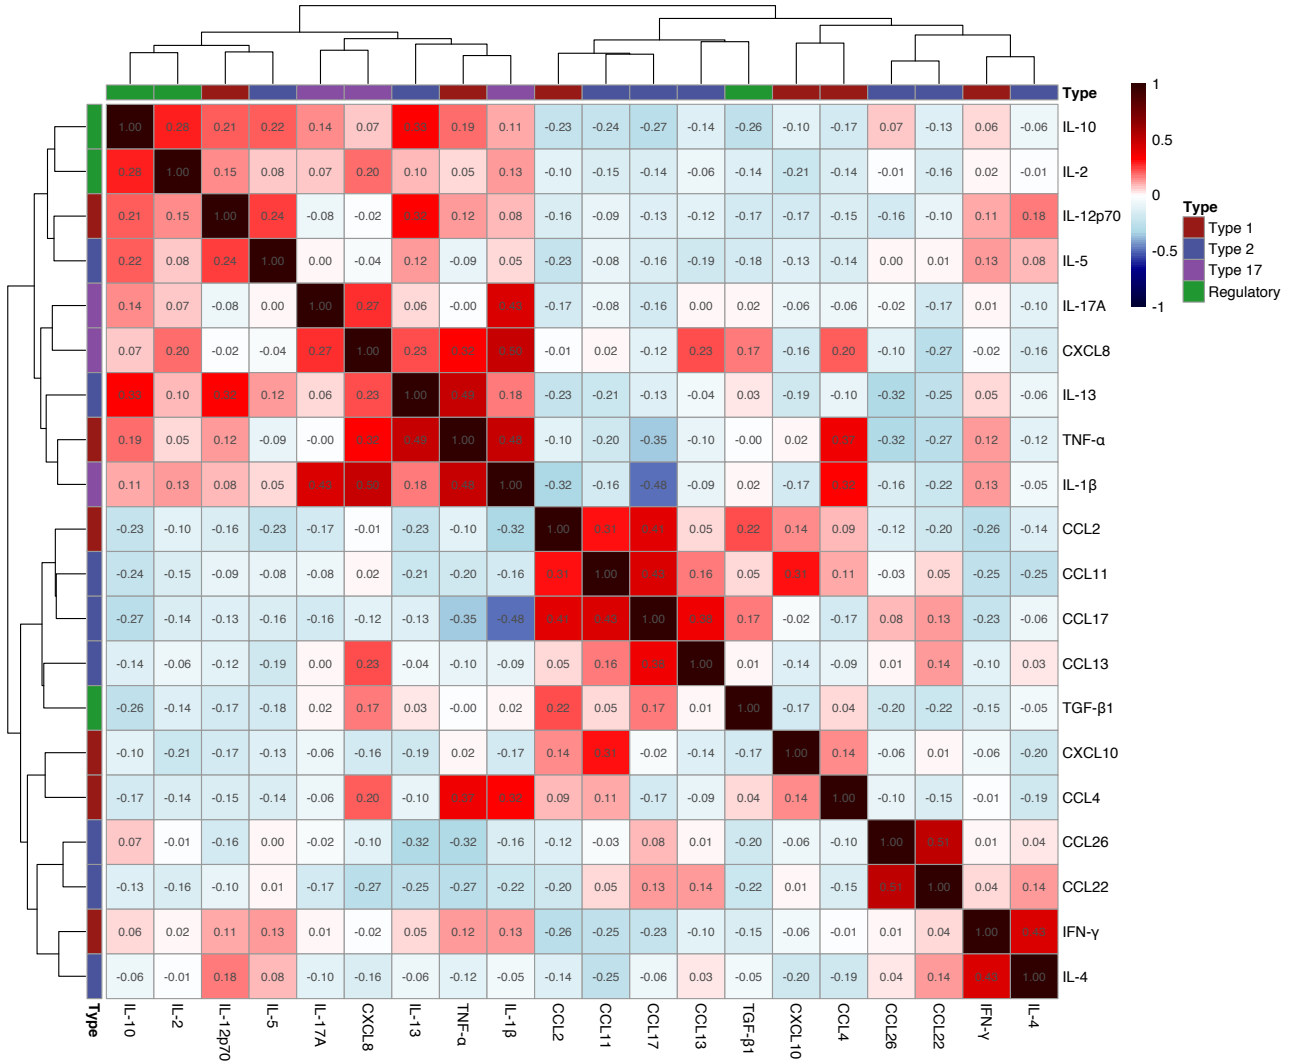

## Supplementary Figure 7: Adjustment of bacterial asthma score

Correlation between bacterial asthma score and genus-level relative abundances of all bacteria, before and after successive adjustment for collinearity by Principal Component Analysis (PCA) of all bacteria except *Veillonella*, *Gemella*, *Prevotella*, *Gemella*, *Bacilli*, *Bacillales*, *Streptococcus*, and *Lactobacillus*. After adjustment for 4 PCs, the majority of the collinearity is removed. Boxplot features: Box denotes 25<sup>th</sup> and 75<sup>th</sup> percentile, middle line denotes median, whiskers extend to any data points inside 1.5 x interquartile range from the box. N=499.

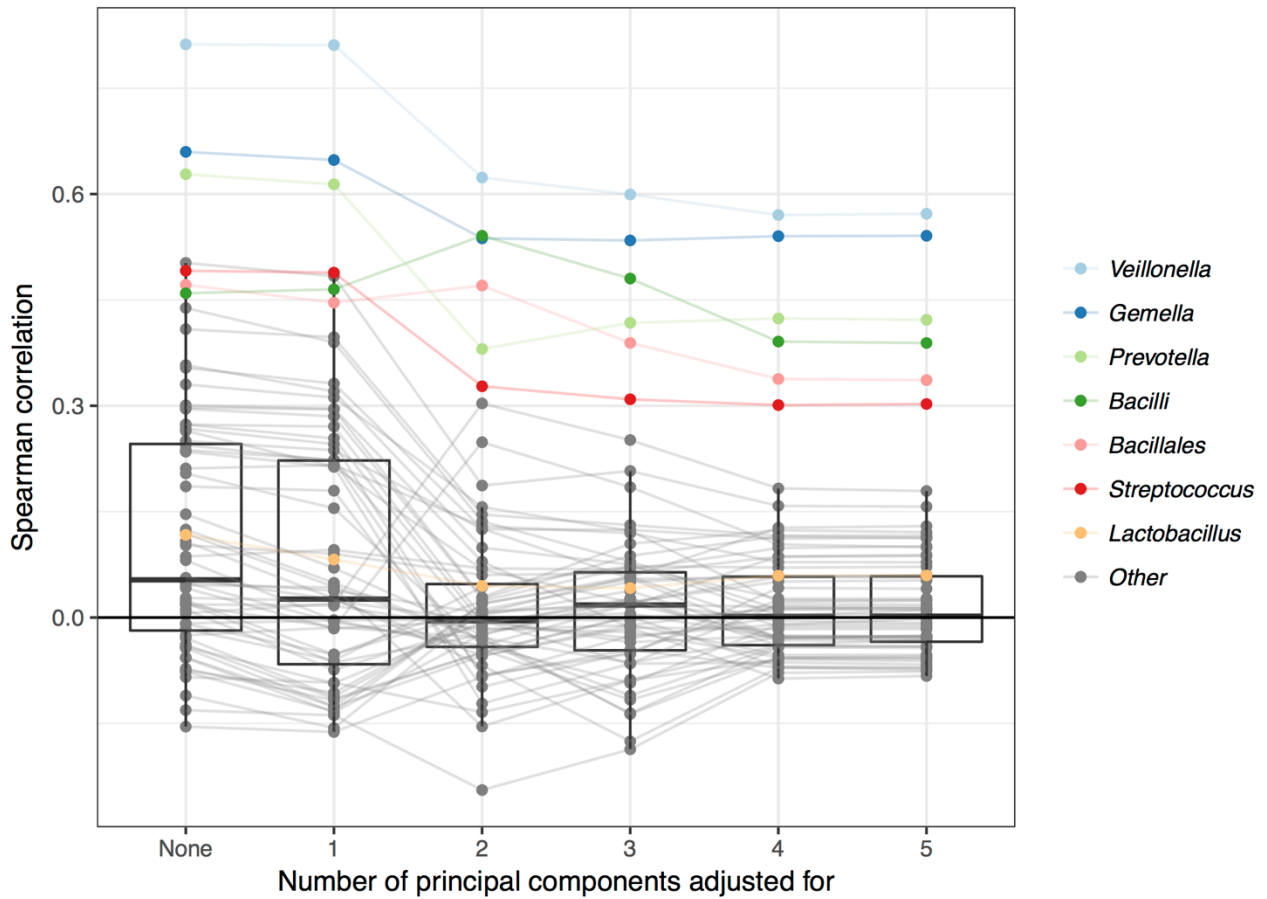

## Supplementary Figure 8: Immune mediator score loadings

Loadings from cross-validated sparse Partial Least Squares model between immune mediators and the bacterial asthma score, adjusted for other bacteria. Median values across leave-one-out cross-validation are shown, with standard deviations drawn as error bars. N=499.

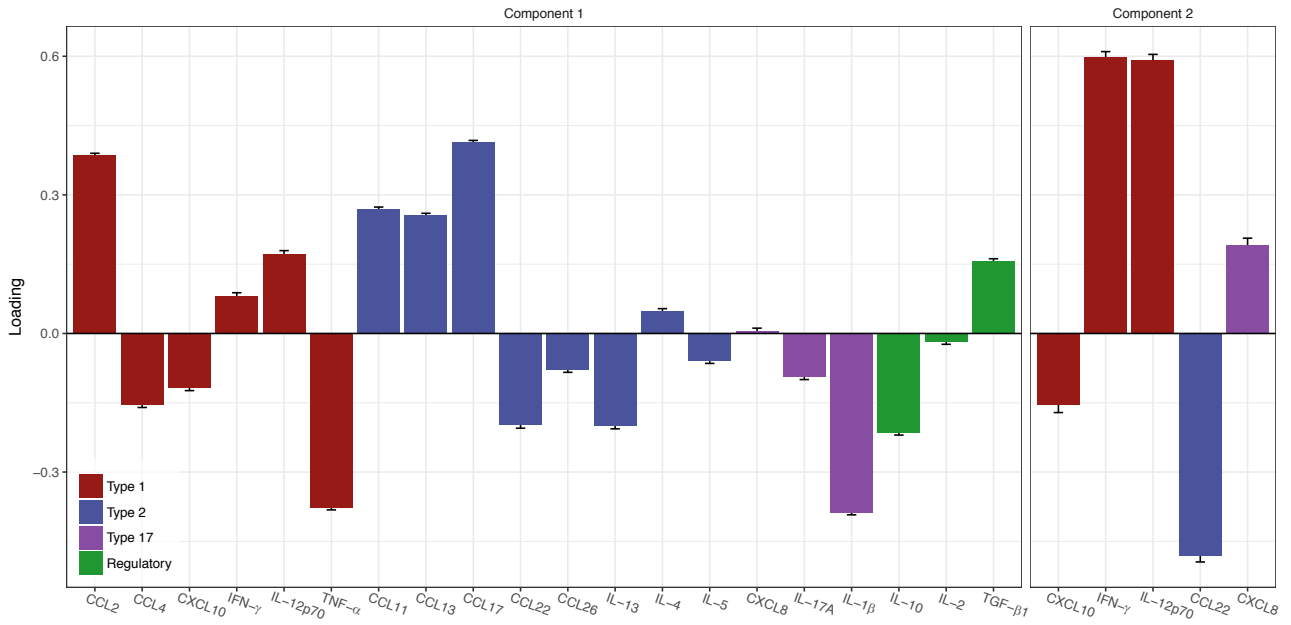

Supplement: 41467_2019_12989_MOESM1_ESM.pdf [file 41467_2019_12989_MOESM1_ESM.pdf]
